## The effects of smoking and alcoholism in acute coronary syndrome

Correia J.; Neto V.; Santos J.; Pires I.; Goncalves L.; Costa A.; Cabral J.

Hospital Sao Teotonio, Viseu, Portugal

**Funding Acknowledgements:** Type of funding sources: None.

**Introduction:** Several studies have concluded that smoking increases mortality in patients with coronary disease. On the other hand, a J-shaped dose-effect curve has been used to describe the relationship between alcohol and cardiovascular mortality. According to the majority of studies, a moderate intake of alcohol is associated with a decrease in mortality, while an excessive alcohol intake appears to increase mortality.

**Aim:** To evaluate the effect of smoking and excessive alcohol intake in hospital mortality and 1-year mortality in patients hospitalized due to acute coronary syndrome (ACS).

**Methods:** A single-centre retrospective study was conducted, with inclusion of all consecutive patients admitted in the Cardiology Department due to ACS. Follow-up started after hospital admission and ended upon hospital death, death within the following 12 months or 12 months after study entry. Patients were divided in two groups: smokers (Group-A) and non-smokers (Group-B), to analyse the effect of smoking in hospital mortality and 1-year mortality. To analyse the effect of excessive alcohol intake, patients were also divided in other two groups: Group-C (excessive drinkers) and Group-D (non-excessive drinkers). Statistical analysis was performed with SPSS and a p value < 0.05 was considered statistically significant.

**Results:** 1120 patients (68.9% male, mean age  $69.12 \pm 12.67$  years) were included in this study. 20.5% were smokers and 3.2% had a previous excessive alcohol intake.

Between Group-A and Group-B, a statistically significant difference was observed in gender (93.1% male in Group-A vs 62.9% male in Group-B,  $p = 0.002$ ), but not in age ( $p = 0.116$ ). Hospital mortality rates in Group-A and Group-B were respectively 6.0% and 8.7% ( $p = 0.191$ ) and 1-year mortality rates were 3.1% vs 5.1% ( $p = 0.239$ ).

Between Group-C and Group-D, a statistically significant difference was observed in gender (94.4% male in Group-C vs 69.8% male in Group-B,  $p < 0.001$ ), but not in age ( $p = 0.730$ ). Hospital mortality rates in Group-C and Group-D were respectively 25% and 9.6% ( $p = 0.003$ ) and 1-year mortality were 3.8% vs 6.6% ( $p = 0.577$ ).

**Conclusions:** Smoking did not have a positive or negative effect in hospital mortality and 1-year mortality. However, excessive alcohol intake was associated with increased hospital mortality in this population.
